# Supplementary material for: Intraclonal Protein Expression Heterogeneity in Recombinant CHO Cells
Source: PubMed Central journal article supplement (PMC2793030; doi:10.1371/journal.pone.0008432), 2009-12-23
Supplement: pone.0008432.s005.pdf [file pone.0008432.s005.pdf]

**Table S1. Mean cell size and relative DNA content of host cells and recombinant clones (at steady state).**

| <sup>a</sup> Cell line | <sup>b</sup> Mean cell diameter ( $\mu\text{m}$ ) | <sup>c</sup> Relative mean cell volume | <sup>d</sup> DNA index |
|------------------------|---------------------------------------------------|----------------------------------------|------------------------|
| CHO-K1                 | 12.9 $\pm$ 0.1                                    | 1                                      | 1                      |
| 5H6                    | 12.7 $\pm$ 0.1                                    | 0.96 $\pm$ 0.02                        | 1.03 $\pm$ 0.05        |
| 5H6-GC2                | 13.8 $\pm$ 0.1                                    | 1.24 $\pm$ 0.02                        | 1.06 $\pm$ 0.05        |
| 5H6-GC7                | 13.9 $\pm$ 0.1                                    | 1.26 $\pm$ 0.02                        | 1.16 $\pm$ 0.06        |
| 5H6-GE5                | 13.8 $\pm$ 0.1                                    | 1.23 $\pm$ 0.02                        | 1.10 $\pm$ 0.05        |
| 5H6-GF10               | 14.1 $\pm$ 0.1                                    | 1.32 $\pm$ 0.02                        | 1.15 $\pm$ 0.05        |
| 5H6-GG8                | 15.2 $\pm$ 0.1                                    | 1.66 $\pm$ 0.03                        | 2.04 $\pm$ 0.17        |

<sup>a</sup> Untransfected host cells (CHO-K1), parental clone (5H6), and subclones on Day 57 post-subcloning, after plateau in expression (steady state). <sup>b</sup> Diameter determined by image analysis (Cedex HiRes). Mean from several thousand cells. Assumes circular cross-section. Estimated uncertainty,  $\pm$  0.1  $\mu\text{m}$  (standard error). <sup>c</sup> Cell volume relative to CHO-K1, calculated from diameter measurement, assuming spherical cells. Errors propagated. <sup>d</sup> DNA index represents DNA content relative to CHO-K1 (see Supplementary Methods in **Supporting Information, Text S1**). Uncertainty (standard error) includes error estimate for non-linearity correction. Note: altered ploidy is not uncommon in recombinant CHO cell lines [1-3].

## References

1. Derouazi M, Martinet D, Schmutz NB, Flaction R, Wicht M, et al. (2006) Genetic characterization of CHO production host DG44 and derivative recombinant cell lines. *Biochemical and Biophysical Research Communications* 340: 1069-1077.
2. Jun SC, Kim MS, Hong HJ, Lee GM (2006) Limitations to the development of humanized antibody producing Chinese hamster ovary cells using glutamine synthetase-mediated gene amplification. *Biotechnology Progress* 22: 770-780.
3. Lattenmayer C, Loeschel M, Steinfellner W, Trummer E, Mueller D, et al. (2006) Identification of transgene integration loci of different highly expressing recombinant CHO cell lines by FISH. *Cytotechnology* 51: 171-182.
